# Supplementary material for: Label-free X-ray estimation of brain amyloid burden
Source: PubMed Central journal article supplement (PMC7689528; doi:10.1038/s41598-020-77554-5), 2020-11-25
Supplement: 41598_2020_77554_MOESM1_ESM.pdf [file 41598_2020_77554_MOESM1_ESM.pdf]

# **Supplementary Information for “Label-free x-ray estimation of brain amyloid burden”**

**Eshan Dahal<sup>1,2</sup>, Bahaa Ghamraoui<sup>1</sup>, Meijun Ye<sup>3</sup>, J. Carson Smith<sup>4</sup>, & Aldo Badano<sup>1,2\*</sup>**

<sup>1</sup>Division of Imaging, Diagnostics, and Software Reliability, Office of Science and Engineering Laboratories, Center for Devices and Radiological Health, Food and Drug Administration, Silver Spring, MD 20993, USA

<sup>2</sup>Fischell Department of Bioengineering, University of Maryland, College Park, MD20742, USA

<sup>3</sup>Division of Biomedical Physics, Office of Science and Engineering Laboratories, Center for Devices and Radiological Health, Food and Drug Administration, Silver Spring, MD 20993, USA

<sup>4</sup>School of Public Health, University of Maryland, College Park, MD 20742, USA

\*E-mail:[aldo.badano@fda.hhs.gov](mailto:aldo.badano@fda.hhs.gov)

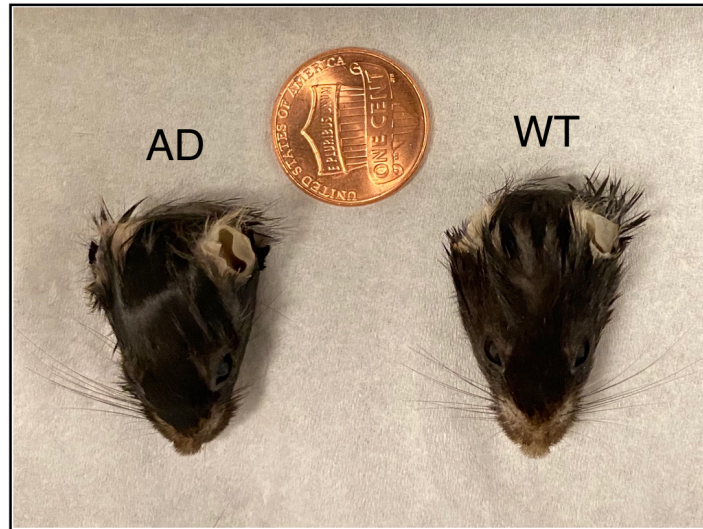

**Supplementary Figure 1.** AD and WT mouse head samples used in the sSAXS study.

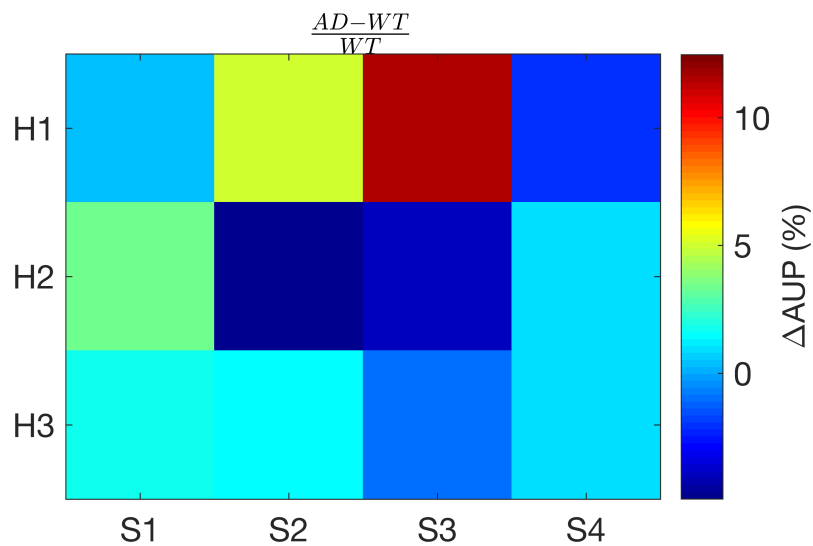

**Supplementary Figure 2.** Initial AD and WT mouse head scanning results with a 0.5 mm polychromatic x-ray beam. Each mouse head was scanned between eye and ear (S1-S4, sagittal plane,  $\Delta x = 2$  mm) at different heights (H1-H3,  $\Delta z = 1$  mm).

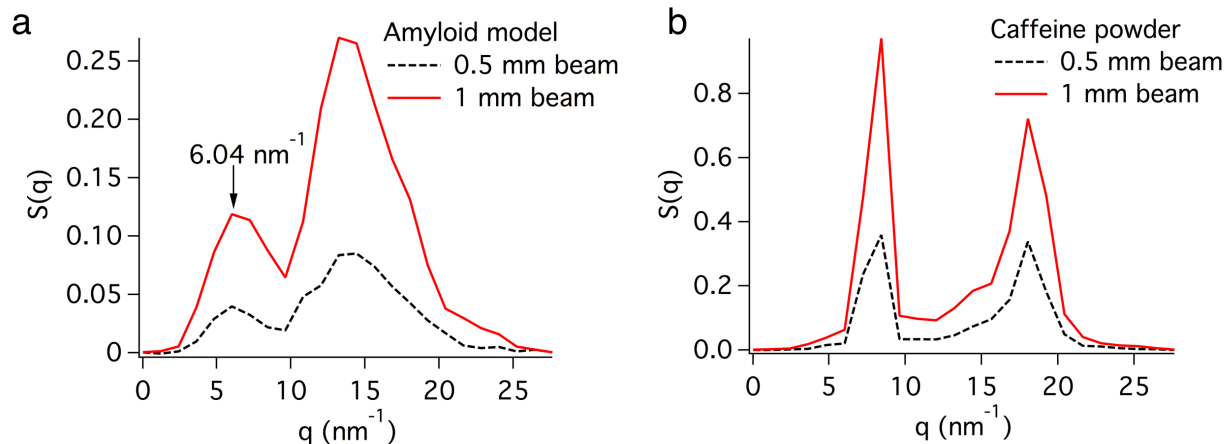

**Supplementary Figure 3.**  $S(q)$  of amyloid model (a) and caffeine (b) using 1 mm vs. 0.5 mm x-ray beam spot size.

|       | H1S2<br>(isocortex [MO + SS]) |                  | H1S3<br>(isocortex + hippocampus) |                  | H3S4<br>(midbrain + pons) |                  |
|-------|-------------------------------|------------------|-----------------------------------|------------------|---------------------------|------------------|
|       | $\Delta$ AUP                  | Amyloid load (%) | $\Delta$ AUP                      | Amyloid load (%) | $\Delta$ AUP              | Amyloid load (%) |
| WT    | 0.00 ± 0.02                   | 0.5 ± 0.3        | 0.00 ± 0.02                       | 0.9 ± 0.4        | 0.00 ± 0.03               | 0.4 ± 0.3        |
| AD I  | 0.04 ± 0.03                   | 8.4 ± 2.0        | 0.15 ± 0.03                       | 11.4 ± 2.4       | -0.02 ± -0.05             | 1.4 ± 1.5        |
| AD II | 0.14 ± 0.03                   | 11.1 ± 2.3       | 0.14 ± 0.04                       | 12.5 ± 1.4       | 0.04 ± 0.05               | 2.7 ± 2.9        |

**Supplementary Table 1.** Tabulated data of  $\Delta$ AUP (fraction) and amyloid load (%).

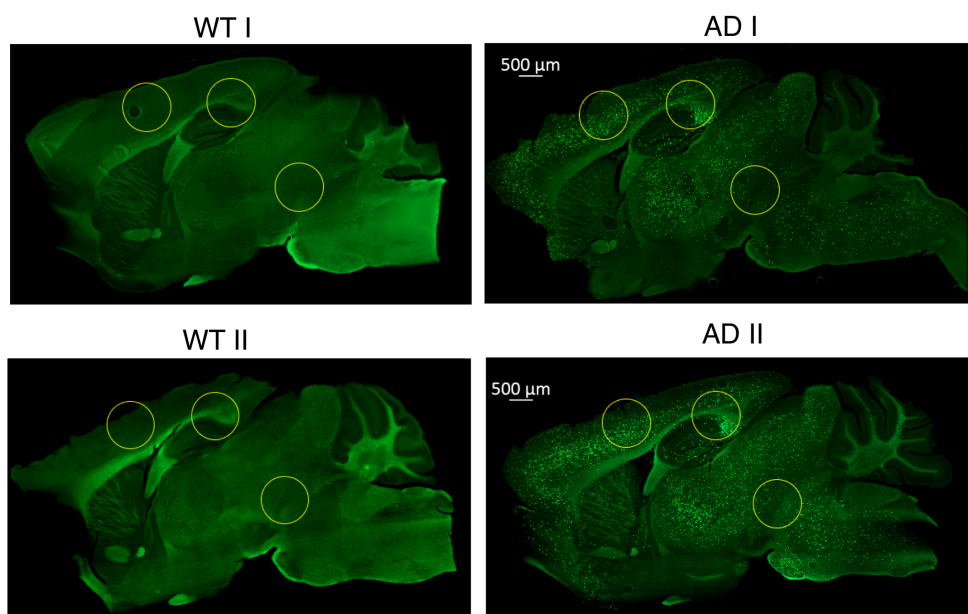

**Supplementary Figure 4.** Representative histology images of each mouse stained with Thioflavin S. Yellow circle shows ROI.
